# Supplementary material
Source: PubMed Central journal article supplement (PMC3102355)
Supplement: 1019419108_pnas.1019419108_SI.pdf [file 1019419108_pnas.1019419108_SI.pdf]

# Supporting Information

Maréchal and Rich 10.1073/pnas.1019419108

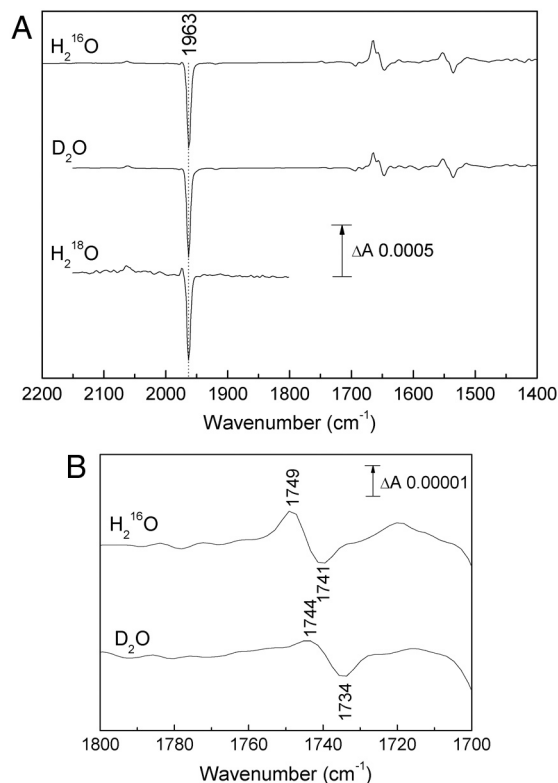

**Fig. S1.** Light-induced CO photolysis transmission FTIR difference spectra of fully reduced bovine CcO-CO. (A) FTIR difference spectra were recorded in  $\text{H}_2^{16}\text{O}$  (top trace, average of 7,500),  $\text{D}_2\text{O}$  (middle trace, average of 10,000), and  $\text{H}_2^{18}\text{O}$  (lower trace, average of 650) media. All data were normalized to their CO band intensities at  $1963\text{ cm}^{-1}$ . (B) Expanded  $1,800\text{--}1,700\text{ cm}^{-1}$  region showing protonated carboxyl group shifts. The signals at  $1,749$  (+) and  $1,741$  (–) in  $\text{H}_2^{16}\text{O}$  are shifted down to  $1,744$  (+) and  $1,734$  (–) in  $\text{D}_2\text{O}$ .

**Table S1.** Frequencies of the Gaussian components used for fitting to the experimental CO photolysis transmission FTIR difference spectra of Fig. 2 in  $\text{H}_2^{16}\text{O}$  (top trace) and  $\text{H}_2^{18}\text{O}$  (lower trace) media in the  $3,700\text{--}3,560\text{ cm}^{-1}$  range. All bands were fixed to the same FWHM of  $6\text{ cm}^{-1}$

|                                        | Frequency, $\text{cm}^{-1}$ |          |          |          |           |          |          |          |          |          |          |          |          |                 |                 |
|----------------------------------------|-----------------------------|----------|----------|----------|-----------|----------|----------|----------|----------|----------|----------|----------|----------|-----------------|-----------------|
| $\text{H}_2^{16}\text{O}$              | 3,680(+)                    | 3,669(–) | 3,654(–) | 3,645(+) | 3,640(+)  | 3,630(+) | 3,619(–) | 3,615(–) | 3,609(+) | 3,601(+) | 3,594(–) | 3,581(–) | 3,576(+) | 3,569(+)        | 3,560(–)        |
| $\text{D}_2\text{O}$                   | —                           | —        | —        | —        | —         | —        | —        | —        | —        | —        | —        | —        | —        | —               | —               |
| $\text{H}_2^{18}\text{O}$              | 3,665(+)                    | 3,657(–) | 3,638(–) | 3,632(+) | 3,623(+)* | —        | 3,613(–) | 3,605(–) | 3,599(+) | 3,591(+) | 3,576(–) | 3,569(–) | 3,564(+) | ND <sup>†</sup> | ND <sup>†</sup> |
| $\Delta\nu^{18}\text{O-}^{16}\text{O}$ | –15                         | –12      | –16      | –13/–8   | –17/–7    | —        | –6       | –10      | –10      | –10      | –18      | –12      | –12      | —               | —               |

ND, not determined.

\*Whereas three components were required to fit the data in the  $3,645\text{--}3,630\text{ cm}^{-1}$  region in  $\text{H}_2^{16}\text{O}$ , only two equivalent components were evident in  $\text{H}_2^{18}\text{O}$ . Hence their band equivalencies and  $\Delta\nu^{18}\text{O-}^{16}\text{O}$  values are uncertain.

<sup>†</sup>The filter cut off data below  $3,560\text{ cm}^{-1}$
